# Supplementary material for: Methods for evaluating gene expression from Affymetrix microarray datasets
Source: PubMed Central journal article supplement (PMC2442103; doi:10.1186/1471-2105-9-284), 2008-06-17

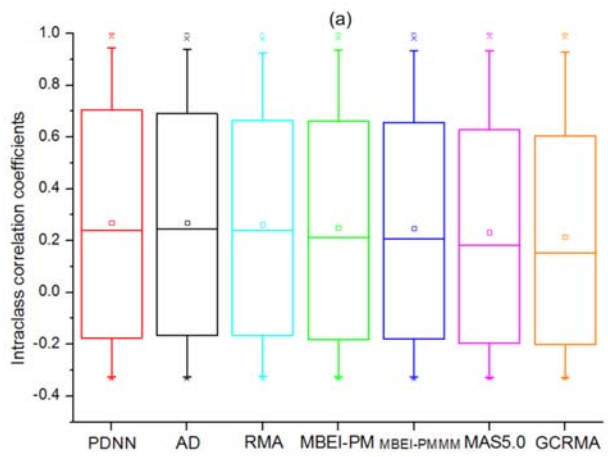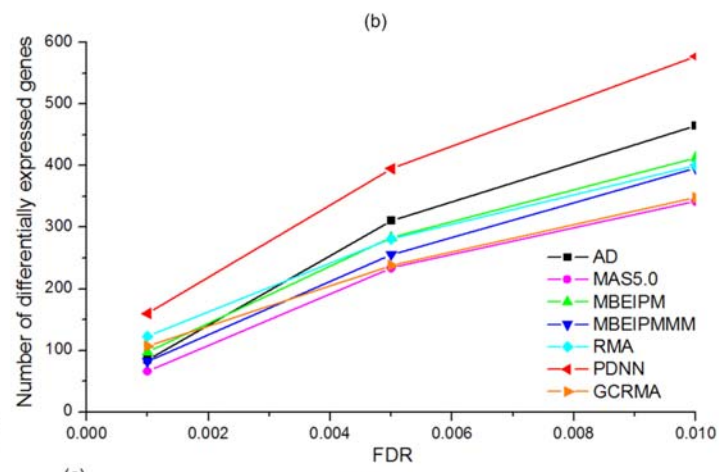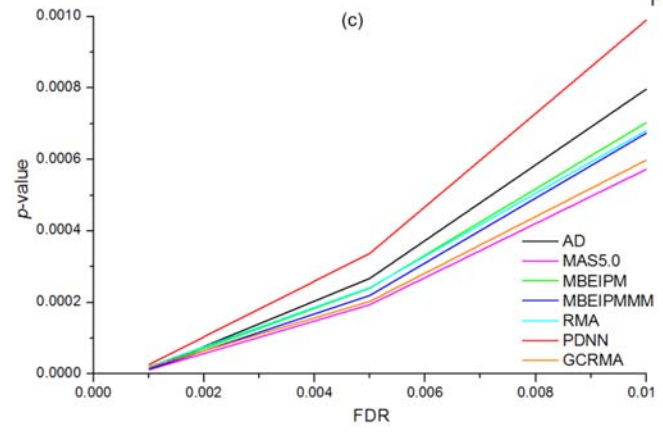

Supplement: 1471-2105-9-284-S2.pdf [file 1471-2105-9-284-S2.pdf]
